# Supplementary material
Source: PubMed Central journal article supplement (PMC4447887)
Supplement: supp_dev064_dev064supp_table1.pdf [file supp_dev064_dev064supp_table1.pdf]

**Supplementary Table S1** Fruit and vegetable items in the food frequency questionnaire (FFQ) and pesticide data program (PDP), and corresponding scores for first, second and third measure and a final score.

| Definition of measure contamination |                                                | First score | Second score | Third score | Final score |
|-------------------------------------|------------------------------------------------|-------------|--------------|-------------|-------------|
| Items in FFQ                        | Items in PDP                                   |             |              |             |             |
| Peas or lima beans (FFC)            | Sweet pea, fz                                  | 0           | 0            | 0           | 0           |
| Grapefruit                          | Grapefruit                                     | 0           | 0            | 0           | 0           |
| Dried plums or prunes               | Dried plum                                     | 0           | 0            | 0           | 0           |
| Onions                              | Onions                                         | 0           | 0            | 0           | 0           |
| Beans or lentils                    | Beans                                          | 0           | 0            | 0           | 0           |
| Avocado                             | Avocado                                        | 0           | 0            | 0           | 0           |
| Corn (FFC)                          | Corn, fz                                       | 0           | 0            | 0           | 0           |
| Cabbage or cole slaw                | Cabbage                                        | 0           | 1            | 0           | 1           |
| Cantaloupe                          | Cantaloupe                                     | 0           | 1            | 1           | 2           |
| Tofu                                | Soybeans                                       | 2           | 0            | 0           | 2           |
| Bananas                             | Bananas                                        | 1           | 0            | 1           | 2           |
| Eggplant, summer squash, zucchini   | Eggplant, summer squash (0.5:0.5) <sup>a</sup> | 0           | 1            | 1           | 2           |
| Yam or sweet potatoes               | Sweet potatoes                                 | 0           | 2            | 0           | 2           |
| Tomatoes                            | Tomatoes                                       | 1           | 1            | 1           | 3           |
| Oranges                             | Oranges                                        | 1           | 1            | 1           | 3           |
| Cauliflower                         | Cauliflower                                    | 1           | 2            | 0           | 3           |
| Broccoli                            | Broccoli                                       | 2           | 0            | 1           | 3           |
| Carrots                             | Carrots                                        | 1           | 0            | 2           | 3           |
| Head lettuce, leaf lettuce          | Lettuce                                        | 1           | 0            | 2           | 3           |
| String beans                        | Green beans                                    | 1           | 1            | 1           | 3           |
| Grape or raisin                     | Grape, raisin (0.6: 0.4) <sup>a</sup>          | 1           | 1            | 2           | 4           |
| Kale, mustard, chard greens         | Kale                                           | 1           | 2            | 1           | 4           |
| Winter squash                       | Winter squash                                  | 1           | 2            | 1           | 4           |
| Fresh apple or pear                 | Apple, pear (0.7:0.3) <sup>a</sup>             | 2           | 1            | 2           | 5           |
| Peach or plum                       | Peach, plum (0.7: 0.3) <sup>a</sup>            | 2           | 1            | 2           | 5           |
| Potatoes                            | Potatoes                                       | 2           | 2            | 1           | 5           |
| Spinach, cooked                     | Spinach, frozen                                | 1           | 2            | 2           | 5           |
| Blueberry (FFC)                     | Blueberry, Fs, Fz (0.5:0.5) <sup>a</sup>       | 1           | 2            | 2           | 5           |
| Celery                              | Celery                                         | 2           | 2            | 2           | 6           |
| Strawberries (FFC)                  | Strawberries, fresh                            | 2           | 2            | 2           | 6           |
| Spinach, raw                        | Spinach, fresh                                 | 2           | 2            | 2           | 6           |
| Green/yellow/red peppers            | Sweet peppers                                  | 2           | 2            | 2           | 6           |

FFC, fresh, frozen or canned; Fs, fresh; Fz, frozen.

<sup>a</sup>Ratio weighted for pesticide residue for each produce according to the ratio of consumption of each produce from the USDA report.
