# Supplementary material
Source: PubMed Central journal article supplement (PMC4447887)
Supplement: supp_dev064_dev064supp_table2.pdf [file supp_dev064_dev064supp_table2.pdf]

**Supplementary Table SII Intake of high pesticide residue fruit and vegetable intake and adjusted<sup>a</sup> prevalence (95% CI) of low semen quality parameters.<sup>b</sup>**

| <b>Quartile intake<br/>[range, servings/<br/>day]</b> | <b>% of low sperm count<br/>(&lt;39 million/ejaculate)</b> | <b>% of low sperm<br/>concentration<br/>(&lt;15 million/ml)</b> | <b>% of low motility<br/>(PN + RP &lt; 40%)</b> | <b>% of low normal<br/>morphology<br/>(normal &lt;4%)</b> |
|-------------------------------------------------------|------------------------------------------------------------|-----------------------------------------------------------------|-------------------------------------------------|-----------------------------------------------------------|
| Q1 [0.2, 0.6]                                         | 0.02 (0.005, 0.08)                                         | 0.03 (0.01, 0.13)                                               | 0.31 (0.16, 0.51)                               | 0.16 (0.07, 0.33)                                         |
| Q2 [0.6, 0.9]                                         | 0.03 (0.01, 0.09)                                          | 0.04 (0.01, 0.14)                                               | 0.34 (0.20, 0.52)                               | 0.42 (0.25, 0.61)                                         |
| Q3 [0.9, 1.5]                                         | 0.12 (0.05, 0.25)*                                         | 0.14 (0.05, 0.31)                                               | 0.39 (0.24, 0.56)                               | 0.27 (0.14, 0.46)                                         |
| Q4 [1.5, 3.6]                                         | 0.14 (0.05, 0.36)*                                         | 0.05 (0.01, 0.2)                                                | 0.58 (0.36, 0.78)                               | 0.54 (0.30, 0.77)*                                        |
| P, trend <sup>c</sup>                                 | 0.06                                                       | 0.89                                                            | 0.10                                            | 0.07                                                      |

PR, progressive motility; NP, non-progressive motility.

<sup>a</sup>Adjusted for total energy intake, abstinence time, age, BMI, moderate-vigorous physical activity, race, prudent and western dietary patterns, smoking status, history of varicocele and low-to-moderate residual fruit and vegetable intake.

<sup>b</sup>Low semen quality parameters were defined as semen parameters below World Health Organization lower reference limits (<39 million per ejaculate for total sperm count, < 15 million per ml for sperm concentration, <40% progressive and non-progressive motility for sperm motility and <4% morphologically normal sperm for morphology).

<sup>c</sup>Estimated using median intake in each quartile as a continuous variable.

\*P-value for trend <0.05 compared with men in the lowest quartile of intake.
