# Supplementary material
Source: PubMed Central journal article supplement (PMC4447887)
Supplement: supp_dev064_dev064supp_table3.pdf [file supp_dev064_dev064supp_table3.pdf]

**Supplementary Table SIII Sensitivity analyses: adjusted<sup>a</sup> semen quality parameter [mean (95% CI)] and high/low-to-moderate pesticide residue fruit and vegetable intake using (1) the median levels as cutoff for the three measures of contamination and (2) total rank consumption.**

| Quartile intake [range, servings/day]                                                                      | Total sperm count (millions) | Sperm concentration (millions/ml) | Total motility (% PR + NP) | Progressive motility (% PR) | Sperm morphology (% normal) | Ejaculate volume (ml) |
|------------------------------------------------------------------------------------------------------------|------------------------------|-----------------------------------|----------------------------|-----------------------------|-----------------------------|-----------------------|
| Quartile intake of high pesticide residue fruits and vegetables <sup>b</sup> (median as cutoff)            |                              |                                   |                            |                             |                             |                       |
| Q1 (0.1, 0.5)                                                                                              | 168 (133, 214)               | 63.9 (48.1, 85.0)                 | 52.8 (45.3, 60.3)          | 30.5 (25.5, 35.4)           | 7.6 (6.4, 8.9)              | 3.1 (2.7, 3.5)        |
| Q2 (0.5, 0.8)                                                                                              | 147 (116, 187)               | 55.0 (42.5, 71.1)                 | 47.8 (42.1, 53.5)          | 27.3 (23.5, 31.0)           | 6.0 (4.9, 7.0)*             | 3.0 (2.6, 3.4)        |
| Q3 (0.8, 1.3)                                                                                              | 93 (73, 120)*                | 35.9 (27.5, 46.8)*                | 44.0 (37.4, 50.6)          | 26.1 (21.3, 30.9)           | 6.4 (5.4, 7.3)              | 2.9 (2.5, 3.3)        |
| Q4 (1.3, 3.4)                                                                                              | 104 (77, 140)*               | 48.3 (35.4, 65.8)                 | 39.1 (29.4, 48.7)          | 22.7 (14.6, 30.9)           | 5.0 (3.8, 6.2)*             | 2.3 (1.9, 2.8)*       |
| P, trend <sup>e</sup>                                                                                      | 0.04                         | 0.32                              | 0.06                       | 0.18                        | 0.03                        | 0.02                  |
| Quartile intake of low-to-moderate pesticide residue fruits and vegetables <sup>c</sup> (median as cutoff) |                              |                                   |                            |                             |                             |                       |
| Q1 (0.2, 1.4)                                                                                              | 120 (91, 160)                | 51.8 (37.0, 72.7)                 | 45.4 (37.6, 53.2)          | 27.5 (22.2, 32.9)           | 5.9 (4.7, 7.1)              | 2.7 (2.2, 3.2)        |
| Q2 (1.5, 2.5)                                                                                              | 132 (100, 175)               | 47.6 (35.2, 64.5)                 | 41.9 (35.3, 48.5)          | 25.6 (19.0, 32.1)           | 5.8 (4.7, 6.9)              | 3.1 (2.7, 3.4)        |
| Q3 (2.6, 3.3)                                                                                              | 112 (89, 142)                | 43.3 (34.2, 54.9)                 | 45.9 (39.3, 52.4)          | 26.3 (21.9, 30.7)           | 6.4 (5.5, 7.4)              | 2.8 (2.5, 3.2)        |
| Q4 (3.3, 9.5)                                                                                              | 144 (108, 192)               | 59.6 (42.7, 83.2)                 | 53.3 (44.4, 62.2)          | 28.3 (22.7, 33.9)           | 7.4 (6, 8.7)                | 2.7 (2.2, 3.2)        |
| P, trend <sup>e</sup>                                                                                      | 0.62                         | 0.73                              | 0.23                       | 0.87                        | 0.15                        | 0.90                  |
| Quartile intake of average rank consumption <sup>d</sup>                                                   |                              |                                   |                            |                             |                             |                       |
| Q1 (8, 32)                                                                                                 | 169 (131, 217)               | 65.4 (48.5, 88.1)                 | 52.2 (44.8, 59.6)          | 29.9 (25.0, 34.8)           | 7.5 (6.4, 8.7)              | 3.0 (2.6, 3.5)        |
| Q2 (32, 49)                                                                                                | 155 (122, 196)               | 54.0 (42.2, 69.2)                 | 47.0 (41.5, 52.5)          | 26.2 (22.6, 29.8)           | 6.2 (5.1, 7.4)              | 3.2 (2.8, 3.6)        |
| Q3 (49, 77)                                                                                                | 106 (83, 135)                | 38.8 (29.6, 50.9)                 | 45.2 (38.1, 52.3)          | 25.8 (21.1, 30.5)           | 6.2 (5.2, 7.1)              | 3.0 (2.7, 3.3)        |
| Q4 (77, 196)                                                                                               | 85 (61, 118)                 | 43.9 (31.7, 60.9)                 | 39.5 (30.5, 48.6)          | 25.2 (17.0, 33.3)           | 5.0 (3.9, 6.2)              | 2.1 (1.6, 2.5)        |
| P, trend <sup>e</sup>                                                                                      | 0.003                        | 0.18                              | 0.08                       | 0.52                        | 0.03                        | 0.001                 |

<sup>a</sup>Adjusted for total energy intake, abstinence time, age, BMI, moderate-vigorous physical activity, race, prudent and western dietary patterns, smoking status and history of varicocele.  
<sup>b</sup>Using the median level as cutoff for the three measures of contamination, high pesticide residue fruits and vegetables were defined as a final score = 3. Models were additionally adjusted for low-to-moderate residual fruits and vegetable intake.

<sup>c</sup>Using the median level as cutoff for the three measures of contamination, low-to-moderate pesticide residue fruits and vegetables were defined as a final score = 0, 1 or 2. Models were additionally adjusted for high residual fruits and vegetable intake.

<sup>d</sup>Each food was ranked according to each measurement of contamination and the average rank across the three measures was calculated for each food. Total rank consumption is the summation of average rank times frequency of consumption for each food.

<sup>e</sup>Estimated using median intake in each quartile as a continuous variable.

\*P-value for trend <0.05 compared with men in the lowest quartile of intake.
