# Supplementary material
Source: PubMed Central journal article supplement (PMC4447887)
Supplement: supp_dev064_dev064supp_table4.pdf [file supp_dev064_dev064supp_table4.pdf]

**Supplementary Table SIV Association between adjusted<sup>a</sup> semen quality parameter [mean (95% CI)] and intake of high/low-to-moderate residue fruit and vegetable intake, according to individual measures of contamination.**

|                                                                                                         | <b>Total sperm count (millions)</b> | <b>Sperm concentration (millions/ml)</b> | <b>Total motility (% PR + NP)</b> | <b>Progressive motility (% PR)</b> | <b>Sperm morphology (% normal)</b> | <b>Ejaculate volume (ml)</b> |
|---------------------------------------------------------------------------------------------------------|-------------------------------------|------------------------------------------|-----------------------------------|------------------------------------|------------------------------------|------------------------------|
| Quartile intake [range, servings/day] of high pesticide residue fruits and vegetables <sup>b</sup>      |                                     |                                          |                                   |                                    |                                    |                              |
| First measure: percentage of samples with any detectable pesticides (score = 2)                         |                                     |                                          |                                   |                                    |                                    |                              |
| Q1 [0.1, 0.6]                                                                                           | 152 (121, 191)                      | 59.8 (46.3, 77.4)                        | 50.4 (43.0, 57.9)                 | 28.1 (23.2, 33.1)                  | 7.3 (6.0, 8.6)                     | 2.9 (2.5, 3.4)               |
| Q2 [0.6, 0.9]                                                                                           | 135 (104, 175)                      | 47.8 (36.5, 62.5)                        | 46.9 (41.1, 52.6)                 | 27.1 (23.4, 30.7)                  | 5.8 (4.7, 6.8)*                    | 3.2 (2.8, 3.6)               |
| Q3 [1.0, 1.6]                                                                                           | 105 (81, 136)*                      | 41.8 (31.4, 55.7)                        | 44.5 (37.9, 51.1)                 | 25.7 (21.0, 30.4)                  | 6.4 (5.5, 7.3)                     | 2.8 (2.4, 3.1)               |
| Q4 [1.6, 4.6]                                                                                           | 114 (85, 154)                       | 51.8 (37.6, 71.2)                        | 42.6 (32.6, 52.5)                 | 26.2 (18.2, 34.1)                  | 5.7 (4.4, 7.0)                     | 2.4 (2.0, 2.9)               |
| P, trend <sup>d</sup>                                                                                   | 0.11                                | 0.54                                     | 0.25                              | 0.66                               | 0.33                               | 0.07                         |
| Second measure: percentage of samples with pesticide exceeding tolerance level (score = 2)              |                                     |                                          |                                   |                                    |                                    |                              |
| Q1 [0.0, 0.4]                                                                                           | 160 (124, 207)                      | 54.5 (41.0, 72.4)                        | 49.7 (42.8, 56.6)                 | 27.8 (23.1, 32.6)                  | 7.6 (6.3, 8.9)                     | 3.4 (2.9, 3.8)               |
| Q2 [0.4, 0.6]                                                                                           | 141 (111, 178)                      | 52.1 (39.9, 68.1)                        | 44.8 (38.3, 51.2)                 | 24.8 (20.7, 28.9)                  | 6.1 (5.1, 7.2)                     | 3.1 (2.7, 3.5)               |
| Q3 [0.6, 1.0]                                                                                           | 103 (81, 132)*                      | 40.5 (31.7, 51.7)                        | 43.9 (37.6, 50.2)                 | 25.0 (20.8, 29.3)                  | 5.8 (4.9, 6.7)*                    | 2.8 (2.4, 3.1)*              |
| Q4 [1.0, 3.2]                                                                                           | 104 (71, 151)                       | 54.1 (37.7, 77.7)                        | 46.4 (37.1, 55.8)                 | 30.1 (21.0, 39.3)                  | 5.5 (4.1, 6.8)*                    | 2.1 (1.6, 2.5)*              |
| P, trend <sup>d</sup>                                                                                   | 0.13                                | 0.88                                     | 0.85                              | 0.51                               | 0.12                               | 0.0004                       |
| Third measure: percentage of samples with three or more types of detectable pesticides (score = 2)      |                                     |                                          |                                   |                                    |                                    |                              |
| Q1 [0.1, 0.6]                                                                                           | 172 (130, 228)                      | 65.6 (46.5, 92.7)                        | 51.3 (43.2, 59.5)                 | 29.7 (24.5, 35.0)                  | 7.1 (5.8, 8.3)                     | 3.2 (2.6, 3.7)               |
| Q2 [0.6, 1.2]                                                                                           | 138 (107, 178)                      | 51.0 (39.0, 66.7)                        | 46.9 (40.4, 53.3)                 | 26.5 (22.3, 30.7)                  | 6.5 (5.3, 7.7)                     | 3.0 (2.6, 3.3)               |
| Q3 [1.2, 1.9]                                                                                           | 119 (94, 152)                       | 45.1 (34.6, 58.8)                        | 44.8 (38.4, 51.2)                 | 25.7 (21.4, 30.1)                  | 6.0 (5.2, 6.9)                     | 2.9 (2.6, 3.2)               |
| Q4 [1.9, 5.6]                                                                                           | 83 (59, 117)*                       | 39.6 (27.9, 56.0)                        | 41.0 (31.3, 50.7)                 | 25.0 (15.9, 34.2)                  | 5.4 (4.2, 6.7)                     | 2.3 (1.8, 2.9)               |
| P, trend <sup>d</sup>                                                                                   | 0.006                               | 0.12                                     | 0.21                              | 0.59                               | 0.16                               | 0.06                         |
| Quartile intake[range] of low-to-moderate pesticide residue fruits and vegetables <sup>c</sup>          |                                     |                                          |                                   |                                    |                                    |                              |
| First measure: percentage of samples with any detectable pesticides (score = 0 or 1)                    |                                     |                                          |                                   |                                    |                                    |                              |
| Q1 [0.2, 1.3]                                                                                           | 128 (96, 171)                       | 51.8 (37.1, 72.2)                        | 44.4 (36.7, 52.2)                 | 26.0 (20.9, 31.2)                  | 6.3 (5.0, 7.6)                     | 3.0 (2.4, 3.5)               |
| Q2 [1.4, 2.2]                                                                                           | 129 (95, 174)                       | 45.3 (32.7, 63.0)                        | 39.8 (32.8, 46.8)                 | 24.6 (18.3, 30.9)                  | 5.7 (4.6, 6.7)                     | 3.1 (2.7, 3.4)               |
| Q3 [2.2, 3.1]                                                                                           | 126 (103, 154)                      | 46.8 (37.8, 58.0)                        | 46.1 (39.3, 53.0)                 | 26.2 (21.8, 30.5)                  | 6.6 (5.6, 7.6)                     | 3.0 (2.5, 3.4)               |
| Q4 [3.2, 7.8]                                                                                           | 120 (83, 173)                       | 57.6 (40.0, 83.0)                        | 56.4 (47.7, 65.2)                 | 31.4 (24.8, 37.9)                  | 6.7 (5.3, 8.1)                     | 2.3 (1.8, 2.8)               |
| P, trend <sup>d</sup>                                                                                   | 0.81                                | 0.75                                     | 0.09                              | 0.32                               | 0.63                               | 0.15                         |
| Second measure: percentage of samples with pesticide exceeding tolerance level (score = 0 or 1)         |                                     |                                          |                                   |                                    |                                    |                              |
| Q1 [0.2, 1.6]                                                                                           | 123 (93, 163)                       | 51.3 (36.4, 72.3)                        | 45.2 (37.3, 53.1)                 | 26.3 (21.3, 31.3)                  | 5.8 (4.5, 7.0)                     | 2.8 (2.3, 3.3)               |
| Q2 [1.6, 2.6]                                                                                           | 150 (115, 197)                      | 53.0 (40.0, 70.3)                        | 46.0 (39.5, 52.5)                 | 27.6 (21.5, 33.7)                  | 6.2 (5.0, 7.3)                     | 3.1 (2.8, 3.4)               |
| Q3 [2.6, 3.5]                                                                                           | 115 (90, 146)                       | 44.4 (34.8, 56.7)                        | 46.0 (39.0, 53.1)                 | 27.3 (22.5, 32.2)                  | 6.5 (5.5, 7.5)                     | 2.9 (2.5, 3.3)               |
| Q4 [3.6, 10.2]                                                                                          | 116 (89, 152)                       | 50.4 (37.6, 67.7)                        | 47.8 (39.6, 56.0)                 | 25.7 (20.5, 30.9)                  | 6.8 (5.5, 8.1)                     | 2.6 (2.1, 3.1)               |
| P, trend <sup>d</sup>                                                                                   | 0.55                                | 0.85                                     | 0.70                              | 0.90                               | 0.83                               | 0.34                         |
| Third measure: percentage of samples with three or more types of detectable pesticides (score = 0 or 1) |                                     |                                          |                                   |                                    |                                    |                              |
| Q1 [0.2, 1.3]                                                                                           | 109 (82, 146)                       | 44.8 (32.1, 62.6)                        | 43.8 (35.7, 52.0)                 | 27.9 (20.2, 35.7)                  | 5.6 (4.4, 6.8)                     | 2.8 (2.3, 3.3)               |
| Q2 [1.3, 2.1]                                                                                           | 126 (94, 168)                       | 47.7 (36.7, 61.8)                        | 43.6 (37.8, 49.4)                 | 24.9 (20.5, 29.2)                  | 5.9 (5, 6.8.0)                     | 2.9 (2.6, 3.2)               |
| Q3 [2.1, 2.6]                                                                                           | 123 (96, 157)                       | 45.0 (34.3, 59.1)                        | 43.5 (36.7, 50.4)                 | 25.0 (20.7, 29.4)                  | 6.8 (5.7, 8.0)                     | 2.9 (2.6, 3.3)               |
| Q4 [2.6, 8.5]                                                                                           | 152 (114, 204)                      | 66.6 (47.3, 93.9)                        | 54.8 (44.9, 64.7)                 | 29.7 (23.4, 35.9)                  | 7.0 (5.8, 8.3)                     | 2.7 (2.2, 3.3)               |
| P, trend <sup>d</sup>                                                                                   | 0.21                                | 0.23                                     | 0.20                              | 0.85                               | 0.11                               | 0.87                         |

<sup>a</sup>Adjusted for total energy intake, abstinence time, age, BMI, moderate-vigorous physical activity, race, prudent and western dietary patterns, smoking status and history of varicocele.

<sup>b</sup>Using the tertile as cutoff for the three measures of contamination, high pesticide residue fruits and vegetables were defined as a score = 2. Models were additionally adjusted for low-to-moderate residual fruits and vegetable intake.

<sup>c</sup>Using the tertile level as cutoff for the three measures of contamination, low-to-moderate pesticide residue fruits and vegetables were defined as a score = 0 or 1. Models were additionally adjusted for high residual fruit and vegetable intake.

<sup>d</sup>Estimated using median intake in each quartile as a continuous variable.

\*P-value for trend <0.05 compared with men in the lowest quartile of intake.
