# Supplementary material
Source: PubMed Central journal article supplement (PMC4447887)
Supplement: supp_dev064_dev064supp_table5.pdf [file supp_dev064_dev064supp_table5.pdf]

**Supplementary Table SV Intake of high pesticide residue fruits and vegetables and adjusted<sup>a</sup> semen quality parameters [mean (95% CI)] after additional adjustment for selected dietary factors.**

| Quartile intake [range, servings/day]                                                         | Total sperm count (millions) | Sperm concentration (millions/ml) | Total motility (% PR + NP) | Progressive motility (% PR) | Sperm morphology (% normal) | Semen volume (ml) |
|-----------------------------------------------------------------------------------------------|------------------------------|-----------------------------------|----------------------------|-----------------------------|-----------------------------|-------------------|
| Adding intake of processed meat (serving/day) to the multivariable model in the main analysis |                              |                                   |                            |                             |                             |                   |
| Q1 [0.2, 0.6]                                                                                 | 171 (133, 220)               | 66.4 (48.9, 90.3)                 | 51.6 (44.2, 59.0)          | 29.4 (24.5, 34.3)           | 7.5 (6.3, 8.7)              | 3.0 (2.6, 3.5)    |
| Q2 [0.6, 0.9]                                                                                 | 156 (123, 198)               | 55.3 (43.4, 70.5)                 | 47.9 (42.1, 53.7)          | 26.9 (23.1, 30.6)           | 6.4 (5.2, 7.6)              | 3.1 (2.7, 3.5)    |
| Q3 [0.9, 1.5]                                                                                 | 103 (81, 132)*               | 37.5 (28.4, 49.4)*                | 45.3 (38.3, 52.3)          | 25.8 (21.2, 30.5)           | 6.0 (5.1, 7.0)              | 3.0 (2.7, 3.4)    |
| Q4 [1.5, 3.6]                                                                                 | 85 (62, 116)*                | 43.9 (31.9, 60.3)                 | 39.6 (30.1, 49.0)          | 25.2 (16.9, 33.5)           | 5.1 (3.9, 6.2)              | 2.1 (1.7, 2.5)    |
| P, trend <sup>b</sup>                                                                         | 0.002                        | 0.15                              | 0.09                       | 0.53                        | 0.02                        | 0.001             |
| Adding intake of fish (serving/day) to the multivariable model in the main analysis           |                              |                                   |                            |                             |                             |                   |
| Q1 [0.2, 0.6]                                                                                 | 168 (129, 217)               | 65.8 (48.5, 89.3)                 | 51.3 (43.8, 58.8)          | 29.3 (24.3, 34.3)           | 7.4 (6.2, 8.6)              | 3.0 (2.6, 3.5)    |
| Q2 [0.6, 0.9]                                                                                 | 153 (121, 194)               | 54.7 (42.9, 69.7)                 | 47.6 (41.9, 53.3)          | 26.8 (23.0, 30.6)           | 6.3 (5.1, 7.5)              | 3.1 (2.7, 3.5)    |
| Q3 [0.9, 1.5]                                                                                 | 101 (79, 129)*               | 36.9 (27.9, 48.7)*                | 44.9 (38.0, 51.8)          | 25.7 (21.1, 30.4)           | 5.9 (5.0, 6.9)              | 3.0 (2.7, 3.3)    |
| Q4 [1.5, 3.6]                                                                                 | 90 (65, 123)*                | 44.6 (32.4, 61.6)                 | 39.7 (30.3, 49.2)          | 25.1 (17.0, 33.2)           | 5.3 (4.1, 6.4)*             | 2.2 (1.7, 2.6)*   |
| P, trend <sup>b</sup>                                                                         | 0.008                        | 0.19                              | 0.10                       | 0.51                        | 0.05                        | 0.005             |
| Adding intake of low-fat dairy (serving/day) to the multivariable model in the main analysis  |                              |                                   |                            |                             |                             |                   |
| Q1 [0.2, 0.6]                                                                                 | 169 (130, 220)               | 64.0 (47.6, 86.1)                 | 50.8 (43.5, 58.1)          | 28.7 (23.8, 33.6)           | 7.5 (6.3, 8.7)              | 3.1 (2.7, 3.5)    |
| Q2 [0.6, 0.9]                                                                                 | 155 (121, 197)               | 53.7 (41.8, 68.9)                 | 47.3 (41.4, 53.3)          | 26.4 (22.6, 30.2)           | 6.4 (5.2, 7.6)              | 3.2 (2.7, 3.6)    |
| Q3 [0.9, 1.5]                                                                                 | 102 (80, 131)*               | 36.5 (27.7, 48.0)*                | 44.8 (37.9, 51.7)          | 25.4 (20.9, 30.0)           | 6.0 (5.1, 7.0)              | 3.1 (2.7, 3.4)    |
| Q4 [1.5, 3.6]                                                                                 | 88 (63, 123)*                | 47.1 (33.9, 65.5)                 | 40.8 (31.4, 50.2)          | 26.4 (18.1, 34.7)           | 5.1 (4.0, 6.2)*             | 2.0 (1.6, 2.5)*   |
| P, trend <sup>b</sup>                                                                         | 0.008                        | 0.34                              | 0.17                       | 0.78                        | 0.02                        | 0.0006            |
| Adding intake of saturated fat (% energy) to the multivariable model in the main analysis     |                              |                                   |                            |                             |                             |                   |
| Q1 [0.2, 0.6]                                                                                 | 169 (131, 218)               | 66.1 (48.8, 89.6)                 | 51.8 (44.2, 59.3)          | 29.5 (24.4, 34.6)           | 7.6 (6.3, 8.8)              | 3.0 (2.6, 3.4)    |
| Q2 [0.6, 0.9]                                                                                 | 153 (120, 195)               | 54.4 (42.4, 69.7)                 | 47.5 (41.5, 53.4)          | 26.7 (22.9, 30.5)           | 6.4 (5.2, 7.5)              | 3.1 (2.7, 3.5)    |
| Q3 [0.9, 1.5]                                                                                 | 103 (80, 132)*               | 37.5 (28.4, 49.4)*                | 45.3 (38.4, 52.2)          | 25.8 (21.2, 30.4)           | 6.0 (5.1, 7.0)              | 3.0 (2.7, 3.3)    |
| Q4 [1.5, 3.6]                                                                                 | 88 (63, 121)*                | 44.0 (31.9, 60.8)                 | 39.3 (29.7, 48.8)          | 25.0 (16.7, 33.3)           | 5.1 (3.9, 6.2)*             | 2.2 (1.7, 2.6)*   |
| P, trend <sup>b</sup>                                                                         | 0.005                        | 0.18                              | 0.08                       | 0.51                        | 0.02                        | 0.004             |
| Adding intake of trans fat (% energy) to the multivariable model in the main analysis         |                              |                                   |                            |                             |                             |                   |
| Q1 [0.2, 0.6]                                                                                 | 172 (133, 221)               | 67.3 (49.8, 90.9)                 | 52.1 (44.5, 59.8)          | 30.1 (24.8, 35.3)           | 7.6 (6.4, 8.8)              | 3.0 (2.6, 3.4)    |
| Q2 [0.6, 0.9]                                                                                 | 153 (119, 196)               | 54.4 (42.2, 70.3)                 | 47.5 (41.5, 53.5)          | 26.6 (22.9, 30.3)           | 6.4 (5.2, 7.5)              | 3.1 (2.7, 3.5)    |
| Q3 [0.9, 1.5]                                                                                 | 102 (80, 130)*               | 37.1 (28.4, 48.6)*                | 45.1 (38.3, 51.9)          | 25.4 (21.1, 29.7)           | 6.0 (5.0, 6.9)*             | 3.0 (2.7, 3.4)    |
| Q4 [1.5, 3.6]                                                                                 | 87 (64, 119)*                | 44.0 (32.4, 59.7)                 | 39.2 (29.9, 48.6)          | 24.7 (16.8, 32.6)           | 5.1 (4.0, 6.1)*             | 2.2 (1.7, 2.6)*   |
| P, trend <sup>b</sup>                                                                         | 0.004                        | 0.16                              | 0.08                       | 0.43                        | 0.01                        | 0.005             |
| Adding intake of caffeine (g/day) to the multivariable model in the main analysis             |                              |                                   |                            |                             |                             |                   |
| Q1 [0.2, 0.6]                                                                                 | 169 (130, 220)               | 66.8 (48.8, 91.5)                 | 51.7 (44.3, 59.2)          | 29.5 (24.5, 34.5)           | 7.6 (6.4, 8.8)              | 3.0 (2.6, 3.4)    |
| Q2 [0.6, 0.9]                                                                                 | 153 (120, 195)               | 54.4 (42.6, 69.5)                 | 47.6 (41.7, 53.5)          | 26.7 (22.9, 30.5)           | 6.4 (5.2, 7.6)              | 3.1 (2.7, 3.5)    |
| Q3 [0.9, 1.5]                                                                                 | 102 (78, 132)*               | 36.5 (27.6, 48.4)*                | 45.5 (38.3, 52.6)          | 25.9 (21.2, 30.5)           | 6.0 (5.0, 6.9)*             | 3.0 (2.7, 3.4)    |
| Q4 [1.5, 3.6]                                                                                 | 91 (66, 127)*                | 48.0 (34.4, 66.9)                 | 39.1 (29.3, 49.0)          | 24.9 (16.1, 33.7)           | 5.2 (4.0, 6.4)*             | 2.1 (1.6, 2.5)*   |
| P, trend <sup>b</sup>                                                                         | 0.009                        | 0.27                              | 0.09                       | 0.50                        | 0.03                        | 0.004             |

<sup>a</sup>Adjusted for total energy intake, abstinence time, age, BMI, moderate-vigorous physical activity, race, prudent and western dietary patterns, smoking status, history of varicocele and low-to-moderate pesticide fruit and vegetable intake.

<sup>b</sup>Estimated using median intake in each quartile as a continuous variable.

\*P-value for trend <0.05 compared with men in the lowest quartile of intake.
