# Supplementary material
Source: PubMed Central journal article supplement (PMC4447887)
Supplement: supp_dev064_dev064supp_table6.pdf [file supp_dev064_dev064supp_table6.pdf]

**Supplementary Table SVI Intake of high pesticide residue fruits and vegetables and adjusted<sup>a</sup> semen quality parameters [mean (95% CI)] after restricting analyses to (1) samples collected within 12 months of diet assessment and (2) first sample per man.**

| Quartile intake                                                                                  | Total sperm count (millions) | Sperm concentration (millions/ml) | Total motility (% PR + NP) | Progressive motility (% PR) | Sperm morphology (% normal) | Semen volume (ml) |
|--------------------------------------------------------------------------------------------------|------------------------------|-----------------------------------|----------------------------|-----------------------------|-----------------------------|-------------------|
| Original analysis (338 semen samples among 155 men)                                              |                              |                                   |                            |                             |                             |                   |
| Q1 [0.2, 0.6]                                                                                    | 171 (133, 222)               | 66.1 (49.1, 90.2)                 | 51.7 (44.3, 59.0)          | 29.4 (24.4, 34.4)           | 7.5 (6.3, 8.7)              | 3.0 (2.6, 3.5)    |
| Q2 [0.6, 0.9]                                                                                    | 156 (123, 197)               | 55.4 (43.5, 70.7)                 | 48.0 (42.2, 53.8)          | 26.9 (23.2, 30.7)           | 6.4 (5.2, 7.6)              | 3.1 (2.7, 3.5)    |
| Q3 [0.9, 1.5]                                                                                    | 103 (81, 132)*               | 37.6 (28.5, 49.5)*                | 45.4 (38.5, 52.3)          | 25.9 (21.3, 30.5)           | 6.0 (5.1, 7.0)              | 3.0 (2.7, 3.3)    |
| Q4 [1.5, 3.6]                                                                                    | 86 (63, 118)*                | 43.4 (31.7, 59.6)                 | 38.9 (29.5, 48.4)          | 24.8 (16.5, 33.0)           | 5.1 (3.9, 6.2)*             | 2.2 (1.7, 2.6)*   |
| <i>P</i> , trend <sup>b</sup>                                                                    | 0.003                        | 0.14                              | 0.07                       | 0.47                        | 0.02                        | 0.003             |
| Only semen samples collected within one year of FFQ completion (273 semen samples among 155 men) |                              |                                   |                            |                             |                             |                   |
| Q1 [0.2, 0.6]                                                                                    | 163 (126, 212)               | 66.3 (49.2, 89.4)                 | 51.9 (44.6, 59.3)          | 29.2 (24.1, 34.3)           | 7.6 (6.4, 8.7)              | 3.0 (2.5, 3.4)    |
| Q2 [0.6, 0.9]                                                                                    | 153 (117, 201)               | 55.2 (42.3, 72.0)                 | 48.6 (42.1, 55.1)          | 27.7 (23.5, 31.9)           | 6.5 (5.3, 7.8)              | 3.1 (2.6, 3.5)    |
| Q3 [0.9, 1.5]                                                                                    | 109 (84, 142)*               | 39.4 (29.6, 52.3)*                | 46.2 (39.1, 53.3)          | 26.3 (21.5, 31.1)           | 6.1 (5.0, 7.1)              | 3.0 (2.6, 3.4)    |
| Q4 [1.5, 3.6]                                                                                    | 91 (64, 128)*                | 42.8 (30.5, 60.0)                 | 37.7 (27.8, 47.6)          | 24.9 (16.0, 33.8)           | 5.1 (3.9, 6.3)*             | 2.3 (1.9, 2.8)    |
| <i>P</i> , trend <sup>b</sup>                                                                    | 0.01                         | 0.13                              | 0.04                       | 0.48                        | 0.02                        | 0.03              |
| Only the first semen sample per man (155 semen samples among 155 men)                            |                              |                                   |                            |                             |                             |                   |
| Q1 [0.2, 0.6]                                                                                    | 168 (121, 233)               | 63.1 (45.7, 86.9)                 | 50.7 (42.0, 59.5)          | 27.8 (20.3, 35.3)           | 7.6 (6.3, 9.0)              | 3.1 (2.7, 3.6)    |
| Q2 [0.6, 0.9]                                                                                    | 138 (103, 184)               | 49.7 (37.4, 66.1)                 | 45.1 (37.4, 52.9)          | 27.1 (20.4, 33.7)           | 6.2 (5.0, 7.4)              | 3.1 (2.7, 3.5)    |
| Q3 [0.9, 1.5]                                                                                    | 116 (87, 154)                | 40.0 (30.3, 52.9)*                | 47.8 (40.2, 55.4)          | 27.3 (20.8, 33.8)           | 6.6 (5.4, 7.8)              | 3.2 (2.8, 3.6)    |
| Q4 [1.5, 3.6]                                                                                    | 88 (63, 124)*                | 42.8 (30.5, 60.0)                 | 39.8 (30.7, 49.0)          | 27.5 (19.6, 35.4)           | 4.8 (3.3, 6.2)*             | 2.2 (1.8, 2.7)*   |
| <i>P</i> , trend <sup>b</sup>                                                                    | 0.02                         | 0.26                              | 0.19                       | 0.99                        | 0.03                        | 0.007             |

<sup>a</sup>Adjusted for total energy intake, abstinence time, age, BMI, moderate-vigorous physical activity, race, prudent and western dietary patterns, smoking status, history of varicocele and low-to-moderate pesticide fruit and vegetable intake.

<sup>b</sup>Estimated using median intake in each quartile as a continuous variable.

\**P*-value for trend <0.05 compared with men in the lowest quartile of intake.
